# Supplementary material
Source: publisher figshare collection journal article supplement (https://acs.figshare.com/ndownloader/files/5130712)
Supplement: Supplementary file 1 [file 5130712]

data_og774-2a

_publ_requested_journal          Inorg.Chem.
_publ_contact_author_name        'Dmitry Yu. Naumov'
_publ_contact_author_address     
;Institute of Inorganic Chemistry,
SB Russian Academy of Sciences,
Academition Lavrentiev Avenue 3,
Novosibirsk 90,
630090 Russia
;
_publ_contact_author_email       d.y.naumov@ngs.ru
_publ_contact_author_phone       7(3832)344466
_publ_contact_author_fax         7(3832)344489
loop_
_publ_author_name
_publ_author_address
'Sokolov, Maxim N.'
;Institute of Inorganic Chemistry,
SB Russian Academy of Sciences,
Academition Lavrentiev Avenue 3,
Novosibirsk 90,
630090 Russia
;
'Gushchin, Artem L.'
;Institute of Inorganic Chemistry,
SB Russian Academy of Sciences,
Academition Lavrentiev Avenue 3,
Novosibirsk 90,
630090 Russia
;
'Naumov, Dmitry Yu.'
;Institute of Inorganic Chemistry,
SB Russian Academy of Sciences,
Academition Lavrentiev Avenue 3,
Novosibirsk 90,
630090 Russia
;
'Gerasko, Olga A.'
;Institute of Inorganic Chemistry,
SB Russian Academy of Sciences,
Academition Lavrentiev Avenue 3,
Novosibirsk 90,
630090 Russia
;
'Fedin, Vladimir P.'
;Institute of Inorganic Chemistry,
SB Russian Academy of Sciences,
Academition Lavrentiev Avenue 3,
Novosibirsk 90,
630090 Russia
;

_audit_creation_method           SHELXL-97
_chemical_name_systematic        
; 
 ? 
;
_chemical_name_common            ?
_chemical_melting_point          ?
_chemical_formula_moiety         
;
C6 Mo3 O12 S7, 1.5(C8 H20 N),  Br, K, 1.5(H2 O), 0.5(H3 O)
;
_chemical_formula_sum            'C18 H34.50 Br K Mo3 N1.50 O14 S7'
_chemical_formula_weight         1127.22

loop_
_atom_type_symbol
_atom_type_description
_atom_type_scat_dispersion_real
_atom_type_scat_dispersion_imag
_atom_type_scat_source
C C 0.0033 0.0016 'International Tables Vol C Tables 4.2.6.8 and 6.1.1.4'
H H 0.0000 0.0000 'International Tables Vol C Tables 4.2.6.8 and 6.1.1.4'
N N 0.0061 0.0033 'International Tables Vol C Tables 4.2.6.8 and 6.1.1.4'
O O 0.0106 0.0060 'International Tables Vol C Tables 4.2.6.8 and 6.1.1.4'
S S 0.1246 0.1234 'International Tables Vol C Tables 4.2.6.8 and 6.1.1.4'
Mo Mo -1.6832 0.6857 'International Tables Vol C Tables 4.2.6.8 and 6.1.1.4'
Br Br -0.2901 2.4595 'International Tables Vol C Tables 4.2.6.8 and 6.1.1.4'
K K 0.2009 0.2494 'International Tables Vol C Tables 4.2.6.8 and 6.1.1.4'

_symmetry_cell_setting           'Triclinic'
_symmetry_space_group_name_Hall      '-P 1'
_symmetry_space_group_name_H-M   'P-1'

loop_
_symmetry_equiv_pos_as_xyz
'x, y, z'
'-x, -y, -z'

_cell_length_a                   11.0139(8)
_cell_length_b                   12.6133(12)
_cell_length_c                   13.9776(13)
_cell_angle_alpha                107.069(2)
_cell_angle_beta                 93.029(3)
_cell_angle_gamma                94.690(2)
_cell_volume                     1844.0(3)
_cell_formula_units_Z            2
_cell_measurement_temperature    293(2)
_cell_measurement_reflns_used    5845
_cell_measurement_theta_min      2.60
_cell_measurement_theta_max      30.31

_exptl_crystal_description       plate
_exptl_crystal_colour            red
_exptl_crystal_size_max          0.22
_exptl_crystal_size_mid          0.18
_exptl_crystal_size_min          0.06
_exptl_crystal_density_meas      ?
_exptl_crystal_density_diffrn    2.030
_exptl_crystal_density_method    'not measured'
_exptl_crystal_F_000             1114
_exptl_absorpt_coefficient_mu    2.656
_exptl_absorpt_correction_type   empirical
_exptl_absorpt_correction_T_min  0.5927
_exptl_absorpt_correction_T_max  0.8569
_exptl_absorpt_process_details   'Bruker SADABS'

_exptl_special_details           
; 
 ? 
;

_diffrn_ambient_temperature      293(2)
_diffrn_radiation_wavelength     0.71073
_diffrn_radiation_type           MoK\a
_diffrn_radiation_source         'fine-focus sealed tube'
_diffrn_radiation_monochromator  graphite
_diffrn_measurement_device_type  'Bruker Nonius X8Apex CCD area-detector'
_diffrn_measurement_method       '\f and \w scans'
_diffrn_detector_area_resol_mean 25
_diffrn_standards_number         ?
_diffrn_standards_interval_count ?
_diffrn_standards_interval_time  ?
_diffrn_standards_decay_%        0
_diffrn_reflns_number            13236
_diffrn_reflns_av_R_equivalents  0.0206
_diffrn_reflns_av_sigmaI/netI    0.0332
_diffrn_reflns_limit_h_min       -13
_diffrn_reflns_limit_h_max       9
_diffrn_reflns_limit_k_min       -15
_diffrn_reflns_limit_k_max       15
_diffrn_reflns_limit_l_min       -17
_diffrn_reflns_limit_l_max       17
_diffrn_reflns_theta_min         2.71
_diffrn_reflns_theta_max         26.37
_reflns_number_total             7189
_reflns_number_gt                5838
_reflns_threshold_expression     >2sigma(I)

_computing_data_collection       'Bruker APEX2'
_computing_cell_refinement       'Bruker SAINT'
_computing_data_reduction        'Bruker SAINT'
_computing_structure_solution    'Bruker SHELXTL'
_computing_structure_refinement  'Bruker SHELXTL'
_computing_molecular_graphics    'Bruker SHELXTL'
_computing_publication_material  'Bruker SHELXTL'

_refine_special_details          
; 
 Refinement of F^2^ against ALL reflections.  The weighted R-factor wR and 
 goodness of fit S are based on F^2^, conventional R-factors R are based 
 on F, with F set to zero for negative F^2^. The threshold expression of 
 F^2^ > 2sigma(F^2^) is used only for calculating R-factors(gt) etc. and is 
 not relevant to the choice of reflections for refinement.  R-factors based 
 on F^2^ are statistically about twice as large as those based on F, and R- 
 factors based on ALL data will be even larger. 
;

_refine_ls_structure_factor_coef Fsqd
_refine_ls_matrix_type           full
_refine_ls_weighting_scheme      calc
_refine_ls_weighting_details     
'calc w=1/[\s^2^(Fo^2^)+(0.0632P)^2^] where P=(Fo^2^+2Fc^2^)/3'
_atom_sites_solution_primary     direct
_atom_sites_solution_secondary   difmap
_atom_sites_solution_hydrogens   geom
_refine_ls_hydrogen_treatment    mixed
_refine_ls_extinction_method     none
_refine_ls_extinction_coef       0
_refine_ls_number_reflns         7189
_refine_ls_number_parameters     434
_refine_ls_number_restraints     0
_refine_ls_R_factor_all          0.0442
_refine_ls_R_factor_gt           0.0351
_refine_ls_wR_factor_ref         0.1050
_refine_ls_wR_factor_gt          0.1013
_refine_ls_goodness_of_fit_ref   1.117
_refine_ls_restrained_S_all      1.117
_refine_ls_shift/su_max          0.000
_refine_ls_shift/su_mean         0.000

loop_
_atom_site_label
_atom_site_type_symbol
_atom_site_fract_x
_atom_site_fract_y
_atom_site_fract_z
_atom_site_U_iso_or_equiv
_atom_site_adp_type
_atom_site_occupancy
_atom_site_symmetry_multiplicity
_atom_site_calc_flag
_atom_site_refinement_flags
_atom_site_disorder_assembly
_atom_site_disorder_group
Mo1 Mo 0.07437(3) 0.24246(3) 0.26529(2) 0.02308(10) Uani 1 1 d . . .
Mo2 Mo -0.01933(3) 0.43493(3) 0.26250(2) 0.02407(10) Uani 1 1 d . . .
Mo3 Mo 0.00478(3) 0.27414(3) 0.08728(2) 0.02382(10) Uani 1 1 d . . .
Br1 Br -0.32077(4) 0.17102(4) 0.21675(4) 0.05037(15) Uani 1 1 d . . .
K1 K 0.07719(9) 0.08243(8) -0.36800(7) 0.0358(2) Uani 1 1 d . . .
S11 S -0.07003(10) 0.45776(9) 0.09393(8) 0.0336(2) Uani 1 1 d . . .
S12 S -0.18406(9) 0.34673(9) 0.13849(8) 0.0303(2) Uani 1 1 d . . .
S21 S 0.10352(10) 0.10805(9) 0.09985(8) 0.0321(2) Uani 1 1 d . . .
S22 S -0.07183(9) 0.11830(8) 0.14097(8) 0.0300(2) Uani 1 1 d . . .
S31 S 0.06017(10) 0.39856(8) 0.41847(7) 0.0317(2) Uani 1 1 d . . .
S32 S -0.10119(9) 0.31069(8) 0.34893(8) 0.0301(2) Uani 1 1 d . . .
S123 S 0.16868(9) 0.37930(8) 0.20042(7) 0.0277(2) Uani 1 1 d . . .
O1W O 0.2384(3) -0.0908(3) -0.4227(3) 0.0571(9) Uani 1 1 d . . .
O2WH O 0.4110(4) 0.0428(5) 0.5329(4) 0.1040(19) Uani 1 1 d . . .
O11 O 0.2534(2) 0.2278(2) 0.3147(2) 0.0324(6) Uani 1 1 d . . .
O12 O 0.0520(3) 0.1227(2) 0.3444(2) 0.0312(6) Uani 1 1 d . . .
O13 O 0.3667(3) 0.1486(3) 0.4032(3) 0.0579(10) Uani 1 1 d . . .
O14 O 0.1521(3) 0.0390(2) 0.4400(2) 0.0368(7) Uani 1 1 d . . .
O21 O 0.0770(3) 0.5930(2) 0.3157(2) 0.0362(7) Uani 1 1 d . . .
O22 O -0.1534(2) 0.5382(2) 0.3279(2) 0.0333(7) Uani 1 1 d . . .
O23 O 0.0675(3) 0.7662(2) 0.4148(3) 0.0498(9) Uani 1 1 d . . .
O24 O -0.1869(3) 0.7159(3) 0.3994(3) 0.0499(9) Uani 1 1 d . . .
O31 O 0.1217(2) 0.2899(2) -0.0220(2) 0.0343(7) Uani 1 1 d . . .
O32 O -0.0981(2) 0.1869(2) -0.0492(2) 0.0332(7) Uani 1 1 d . . .
O33 O 0.1452(3) 0.2332(4) -0.1852(2) 0.0664(11) Uani 1 1 d . . .
O34 O -0.0853(3) 0.1187(3) -0.2138(2) 0.0515(9) Uani 1 1 d . . .
N4 N -0.4703(4) 0.2166(4) -0.1317(4) 0.0652(14) Uani 1 1 d . . .
N5 N -0.5000 0.5000 0.5000 0.0457(14) Uani 1 2 d S . .
C11 C 0.2668(4) 0.1630(3) 0.3690(3) 0.0345(10) Uani 1 1 d . . .
C12 C 0.1489(4) 0.1024(3) 0.3883(3) 0.0302(9) Uani 1 1 d . . .
C21 C 0.0188(4) 0.6743(3) 0.3668(3) 0.0344(10) Uani 1 1 d . . .
C22 C -0.1198(4) 0.6446(3) 0.3660(3) 0.0346(10) Uani 1 1 d . . .
C31 C 0.0848(4) 0.2360(4) -0.1143(3) 0.0349(10) Uani 1 1 d . . .
C32 C -0.0431(4) 0.1734(3) -0.1308(3) 0.0331(9) Uani 1 1 d . . .
C41 C -0.3472(6) 0.2752(7) -0.1399(8) 0.124(4) Uani 1 1 d . . .
H41A H -0.3443 0.3521 -0.0984 0.149 Uiso 1 1 calc R . .
H41B H -0.2847 0.2412 -0.1112 0.149 Uiso 1 1 calc R . .
C42 C -0.3159(8) 0.2756(14) -0.2347(12) 0.251(10) Uani 1 1 d . . .
H42A H -0.2980 0.2024 -0.2720 0.376 Uiso 1 1 calc R . .
H42B H -0.2453 0.3278 -0.2284 0.376 Uiso 1 1 calc R . .
H42C H -0.3829 0.2969 -0.2694 0.376 Uiso 1 1 calc R . .
C43 C -0.5738(6) 0.2637(7) -0.1781(7) 0.096(3) Uani 1 1 d . . .
H43A H -0.5599 0.2543 -0.2480 0.115 Uiso 1 1 calc R . .
H43B H -0.6497 0.2196 -0.1769 0.115 Uiso 1 1 calc R . .
C44 C -0.5895(8) 0.3851(8) -0.1283(10) 0.153(5) Uani 1 1 d . . .
H44A H -0.6255 0.3926 -0.0658 0.229 Uiso 1 1 calc R . .
H44B H -0.6417 0.4115 -0.1715 0.229 Uiso 1 1 calc R . .
H44C H -0.5111 0.4282 -0.1157 0.229 Uiso 1 1 calc R . .
C45 C -0.4817(7) 0.2352(6) -0.0215(6) 0.092(2) Uani 1 1 d . . .
H45A H -0.4726 0.3148 0.0122 0.111 Uiso 1 1 calc R . .
H45B H -0.4150 0.2036 0.0050 0.111 Uiso 1 1 calc R . .
C46 C -0.6021(8) 0.1852(9) 0.0044(7) 0.133(4) Uani 1 1 d . . .
H46A H -0.6667 0.2283 -0.0059 0.199 Uiso 1 1 calc R . .
H46B H -0.5952 0.1860 0.0734 0.199 Uiso 1 1 calc R . .
H46C H -0.6201 0.1097 -0.0380 0.199 Uiso 1 1 calc R . .
C47 C -0.4783(6) 0.0916(6) -0.1868(5) 0.079(2) Uani 1 1 d . . .
H47A H -0.5588 0.0578 -0.1809 0.095 Uiso 1 1 calc R . .
H47B H -0.4696 0.0816 -0.2575 0.095 Uiso 1 1 calc R . .
C48 C -0.3843(6) 0.0316(6) -0.1485(7) 0.095(2) Uani 1 1 d . . .
H48A H -0.3050 0.0546 -0.1653 0.142 Uiso 1 1 calc R . .
H48B H -0.4028 -0.0473 -0.1788 0.142 Uiso 1 1 calc R . .
H48C H -0.3847 0.0489 -0.0769 0.142 Uiso 1 1 calc R . .
C51 C -0.4182(12) 0.5275(14) 0.4298(11) 0.089(5) Uani 0.50 1 d P . .
C52 C -0.5036(14) 0.3742(10) 0.4993(12) 0.082(4) Uani 0.50 1 d P . .
C53 C -0.4539(11) 0.5785(9) 0.6083(10) 0.069(3) Uani 0.50 1 d P . .
C54 C -0.5265(7) 0.5517(7) 0.6908(6) 0.095(2) Uani 1 1 d . . .
C55 C -0.6382(9) 0.5133(12) 0.4819(9) 0.067(3) Uani 0.50 1 d P . .
C56 C -0.6408(8) 0.6426(8) 0.4772(7) 0.114(3) Uani 1 1 d . . .

loop_
_atom_site_aniso_label
_atom_site_aniso_U_11
_atom_site_aniso_U_22
_atom_site_aniso_U_33
_atom_site_aniso_U_23
_atom_site_aniso_U_13
_atom_site_aniso_U_12
Mo1 0.0255(2) 0.02151(17) 0.02116(18) 0.00543(13) 0.00021(13) 0.00099(13)
Mo2 0.0280(2) 0.02034(17) 0.02268(18) 0.00476(13) 0.00280(14) 0.00134(13)
Mo3 0.0252(2) 0.02545(18) 0.01926(17) 0.00480(13) 0.00118(13) 0.00122(13)
Br1 0.0358(3) 0.0554(3) 0.0619(3) 0.0241(3) 0.0016(2) -0.0067(2)
K1 0.0435(6) 0.0336(5) 0.0282(5) 0.0062(4) 0.0034(4) 0.0026(4)
S11 0.0395(6) 0.0324(6) 0.0325(6) 0.0146(5) 0.0038(5) 0.0043(4)
S12 0.0284(5) 0.0322(5) 0.0294(5) 0.0081(4) 0.0011(4) 0.0029(4)
S21 0.0361(6) 0.0289(5) 0.0287(5) 0.0030(4) 0.0039(4) 0.0078(4)
S22 0.0335(6) 0.0248(5) 0.0285(5) 0.0052(4) -0.0013(4) -0.0027(4)
S31 0.0414(6) 0.0284(5) 0.0217(5) 0.0030(4) 0.0001(4) 0.0015(4)
S32 0.0328(6) 0.0299(5) 0.0291(5) 0.0104(4) 0.0074(4) 0.0027(4)
S123 0.0280(5) 0.0272(5) 0.0269(5) 0.0078(4) 0.0017(4) -0.0014(4)
O1W 0.055(2) 0.056(2) 0.070(3) 0.031(2) 0.0106(19) 0.0065(17)
O2WH 0.061(3) 0.146(5) 0.149(5) 0.109(4) 0.007(3) 0.016(3)
O11 0.0243(15) 0.0364(16) 0.0390(17) 0.0174(13) -0.0060(12) 0.0000(12)
O12 0.0353(16) 0.0277(14) 0.0340(16) 0.0152(12) -0.0011(13) 0.0037(12)
O13 0.035(2) 0.075(3) 0.080(3) 0.051(2) -0.0034(18) 0.0055(17)
O14 0.0453(19) 0.0342(16) 0.0341(16) 0.0149(14) 0.0026(13) 0.0051(13)
O21 0.0394(17) 0.0217(14) 0.0446(18) 0.0062(13) 0.0055(14) -0.0010(12)
O22 0.0336(16) 0.0249(14) 0.0379(17) 0.0031(12) 0.0050(13) 0.0050(12)
O23 0.062(2) 0.0242(16) 0.055(2) 0.0013(15) -0.0027(17) -0.0018(15)
O24 0.058(2) 0.0314(17) 0.059(2) 0.0069(16) 0.0172(17) 0.0151(15)
O31 0.0327(16) 0.0422(17) 0.0252(15) 0.0069(13) 0.0029(12) -0.0018(13)
O32 0.0329(16) 0.0410(17) 0.0210(14) 0.0037(12) -0.0017(12) 0.0010(12)
O33 0.049(2) 0.103(3) 0.0323(19) 0.000(2) 0.0148(16) -0.013(2)
O34 0.050(2) 0.066(2) 0.0253(17) -0.0033(16) 0.0020(15) -0.0066(17)
N4 0.036(3) 0.076(3) 0.094(4) 0.047(3) -0.008(2) -0.005(2)
N5 0.027(3) 0.045(3) 0.057(4) 0.006(3) -0.001(3) -0.002(2)
C11 0.033(3) 0.036(2) 0.036(2) 0.0128(19) -0.0005(19) 0.0036(18)
C12 0.041(3) 0.024(2) 0.025(2) 0.0055(16) 0.0024(18) 0.0051(17)
C21 0.048(3) 0.025(2) 0.030(2) 0.0091(18) -0.0017(19) 0.0009(19)
C22 0.045(3) 0.029(2) 0.031(2) 0.0098(18) 0.0031(19) 0.0049(19)
C31 0.036(2) 0.046(3) 0.022(2) 0.0077(19) 0.0063(18) 0.0052(19)
C32 0.034(2) 0.034(2) 0.028(2) 0.0044(18) 0.0049(18) 0.0059(18)
C41 0.036(4) 0.125(7) 0.254(12) 0.133(8) -0.012(5) -0.012(4)
C42 0.063(6) 0.46(2) 0.39(2) 0.38(2) 0.060(9) 0.051(9)
C43 0.039(4) 0.131(7) 0.147(7) 0.094(6) -0.014(4) 0.005(4)
C44 0.084(6) 0.131(8) 0.291(15) 0.139(10) -0.004(8) 0.014(5)
C45 0.089(6) 0.086(5) 0.096(6) 0.021(4) -0.027(4) 0.019(4)
C46 0.109(7) 0.203(11) 0.130(8) 0.100(8) 0.045(6) 0.056(7)
C47 0.062(4) 0.085(5) 0.082(5) 0.020(4) -0.001(3) -0.013(3)
C48 0.070(5) 0.068(5) 0.145(7) 0.031(5) 0.013(5) 0.008(4)
C51 0.054(8) 0.140(14) 0.096(11) 0.063(10) 0.039(7) 0.013(8)
C52 0.097(10) 0.035(6) 0.113(12) 0.020(7) 0.009(9) 0.006(6)
C53 0.059(8) 0.051(7) 0.078(9) 0.005(6) -0.026(6) -0.019(5)
C54 0.096(5) 0.131(7) 0.063(4) 0.027(5) 0.020(4) 0.031(5)
C55 0.025(6) 0.106(10) 0.064(7) 0.017(7) -0.007(5) 0.011(6)
C56 0.128(7) 0.129(7) 0.104(6) 0.043(6) 0.022(5) 0.084(6)

_geom_special_details            
; 
 All esds (except the esd in the dihedral angle between two l.s. planes) 
 are estimated using the full covariance matrix.  The cell esds are taken 
 into account individually in the estimation of esds in distances, angles 
 and torsion angles; correlations between esds in cell parameters are only 
 used when they are defined by crystal symmetry.  An approximate (isotropic) 
 treatment of cell esds is used for estimating esds involving l.s. planes. 
;

loop_
_geom_bond_atom_site_label_1
_geom_bond_atom_site_label_2
_geom_bond_distance
_geom_bond_site_symmetry_2
_geom_bond_publ_flag
Mo1 O11 2.096(3) . ?
Mo1 O12 2.124(3) . ?
Mo1 S123 2.3675(10) . ?
Mo1 S22 2.3999(10) . ?
Mo1 S32 2.4014(10) . ?
Mo1 S31 2.4691(10) . ?
Mo1 S21 2.4882(10) . ?
Mo1 Mo3 2.7148(5) . ?
Mo1 Mo2 2.7241(5) . ?
Mo2 O21 2.087(3) . ?
Mo2 O22 2.114(3) . ?
Mo2 S123 2.3671(10) . ?
Mo2 S32 2.3924(11) . ?
Mo2 S12 2.3957(11) . ?
Mo2 S31 2.4862(11) . ?
Mo2 S11 2.4964(11) . ?
Mo2 Mo3 2.7245(5) . ?
Mo3 O31 2.093(3) . ?
Mo3 O32 2.114(3) . ?
Mo3 S123 2.3652(10) . ?
Mo3 S12 2.4001(11) . ?
Mo3 S22 2.4085(11) . ?
Mo3 S21 2.4841(11) . ?
Mo3 S11 2.4991(11) . ?
K1 O33 2.724(4) . ?
K1 O14 2.762(3) 1_554 ?
K1 O23 2.781(3) 2_565 ?
K1 O14 2.816(3) 2 ?
K1 O34 2.832(3) . ?
K1 O1W 2.882(4) . ?
K1 O24 2.887(3) 2_565 ?
K1 O12 2.963(3) 2 ?
K1 C12 3.209(4) 2 ?
K1 C21 3.321(4) 2_565 ?
K1 C22 3.428(4) 2_565 ?
K1 C31 3.500(4) . ?
S11 S12 2.0575(15) . ?
S21 S22 2.0474(15) . ?
S31 S32 2.0481(15) . ?
O11 C11 1.280(5) . ?
O12 C12 1.284(5) . ?
O12 K1 2.963(3) 2 ?
O13 C11 1.225(5) . ?
O14 C12 1.226(5) . ?
O14 K1 2.762(3) 1_556 ?
O14 K1 2.816(3) 2 ?
O21 C21 1.303(5) . ?
O22 C22 1.304(5) . ?
O23 C21 1.219(5) . ?
O23 K1 2.781(3) 2_565 ?
O24 C22 1.214(5) . ?
O24 K1 2.887(3) 2_565 ?
O31 C31 1.294(5) . ?
O32 C32 1.293(5) . ?
O33 C31 1.217(5) . ?
O34 C32 1.208(5) . ?
N4 C45 1.503(9) . ?
N4 C41 1.516(7) . ?
N4 C43 1.526(7) . ?
N4 C47 1.531(8) . ?
N5 C51 1.462(12) . ?
N5 C51 1.462(12) 2_466 ?
N5 C55 1.561(10) 2_466 ?
N5 C55 1.561(10) . ?
N5 C53 1.577(11) 2_466 ?
N5 C53 1.577(11) . ?
N5 C52 1.581(12) 2_466 ?
N5 C52 1.581(12) . ?
C11 C12 1.530(6) . ?
C12 K1 3.209(4) 2 ?
C21 C22 1.540(6) . ?
C21 K1 3.321(4) 2_565 ?
C22 K1 3.428(4) 2_565 ?
C31 C32 1.529(6) . ?
C41 C42 1.388(14) . ?
C43 C44 1.513(12) . ?
C45 C46 1.528(11) . ?
C47 C48 1.497(9) . ?
C51 C55 1.588(19) 2_466 ?
C51 C52 1.67(2) 2_466 ?
C51 C54 1.736(18) 2_466 ?
C51 C53 1.803(18) 2_466 ?
C52 C56 1.651(16) 2_466 ?
C52 C51 1.67(2) 2_466 ?
C52 C53 1.826(19) 2_466 ?
C52 C55 1.975(18) 2_466 ?
C53 C54 1.538(15) . ?
C53 C51 1.803(18) 2_466 ?
C53 C52 1.826(19) 2_466 ?
C53 C55 1.852(17) 2_466 ?
C54 C51 1.736(18) 2_466 ?
C55 C51 1.588(19) 2_466 ?
C55 C56 1.654(16) . ?
C55 C53 1.852(17) 2_466 ?
C55 C52 1.975(18) 2_466 ?
C56 C52 1.651(16) 2_466 ?

loop_
_geom_angle_atom_site_label_1
_geom_angle_atom_site_label_2
_geom_angle_atom_site_label_3
_geom_angle
_geom_angle_site_symmetry_1
_geom_angle_site_symmetry_3
_geom_angle_publ_flag
O11 Mo1 O12 76.27(11) . . ?
O11 Mo1 S123 84.24(8) . . ?
O12 Mo1 S123 160.37(8) . . ?
O11 Mo1 S22 132.47(8) . . ?
O12 Mo1 S22 85.27(8) . . ?
S123 Mo1 S22 110.16(4) . . ?
O11 Mo1 S32 133.99(8) . . ?
O12 Mo1 S32 83.08(8) . . ?
S123 Mo1 S32 109.56(4) . . ?
S22 Mo1 S32 85.04(4) . . ?
O11 Mo1 S31 90.14(8) . . ?
O12 Mo1 S31 92.20(8) . . ?
S123 Mo1 S31 85.45(4) . . ?
S22 Mo1 S31 134.54(4) . . ?
S32 Mo1 S31 49.71(4) . . ?
O11 Mo1 S21 89.19(8) . . ?
O12 Mo1 S21 96.44(8) . . ?
S123 Mo1 S21 85.47(4) . . ?
S22 Mo1 S21 49.48(4) . . ?
S32 Mo1 S21 134.18(4) . . ?
S31 Mo1 S21 170.92(4) . . ?
O11 Mo1 Mo3 125.57(8) . . ?
O12 Mo1 Mo3 140.84(8) . . ?
S123 Mo1 Mo3 54.96(3) . . ?
S22 Mo1 Mo3 55.77(3) . . ?
S32 Mo1 Mo3 96.00(3) . . ?
S31 Mo1 Mo3 116.96(3) . . ?
S21 Mo1 Mo3 56.84(3) . . ?
O11 Mo1 Mo2 126.18(8) . . ?
O12 Mo1 Mo2 137.69(8) . . ?
S123 Mo1 Mo2 54.87(3) . . ?
S22 Mo1 Mo2 96.70(3) . . ?
S32 Mo1 Mo2 55.21(3) . . ?
S31 Mo1 Mo2 56.95(3) . . ?
S21 Mo1 Mo2 116.84(3) . . ?
Mo3 Mo1 Mo2 60.121(12) . . ?
O21 Mo2 O22 76.56(11) . . ?
O21 Mo2 S123 84.14(8) . . ?
O22 Mo2 S123 160.49(8) . . ?
O21 Mo2 S32 131.32(9) . . ?
O22 Mo2 S32 85.50(8) . . ?
S123 Mo2 S32 109.88(4) . . ?
O21 Mo2 S12 136.31(9) . . ?
O22 Mo2 S12 82.98(8) . . ?
S123 Mo2 S12 109.81(4) . . ?
S32 Mo2 S12 83.98(4) . . ?
O21 Mo2 S31 87.77(9) . . ?
O22 Mo2 S31 96.89(8) . . ?
S123 Mo2 S31 85.08(4) . . ?
S32 Mo2 S31 49.60(4) . . ?
S12 Mo2 S31 133.21(4) . . ?
O21 Mo2 S11 92.59(9) . . ?
O22 Mo2 S11 92.08(8) . . ?
S123 Mo2 S11 85.87(4) . . ?
S32 Mo2 S11 133.45(4) . . ?
S12 Mo2 S11 49.69(4) . . ?
S31 Mo2 S11 170.85(4) . . ?
O21 Mo2 Mo1 124.37(8) . . ?
O22 Mo2 Mo1 140.81(8) . . ?
S123 Mo2 Mo1 54.88(3) . . ?
S32 Mo2 Mo1 55.53(3) . . ?
S12 Mo2 Mo1 95.54(3) . . ?
S31 Mo2 Mo1 56.35(2) . . ?
S11 Mo2 Mo1 116.69(3) . . ?
O21 Mo2 Mo3 127.34(8) . . ?
O22 Mo2 Mo3 137.81(8) . . ?
S123 Mo2 Mo3 54.82(3) . . ?
S32 Mo2 Mo3 95.96(3) . . ?
S12 Mo2 Mo3 55.46(3) . . ?
S31 Mo2 Mo3 116.01(3) . . ?
S11 Mo2 Mo3 57.00(3) . . ?
Mo1 Mo2 Mo3 59.770(13) . . ?
O31 Mo3 O32 76.59(11) . . ?
O31 Mo3 S123 83.68(8) . . ?
O32 Mo3 S123 160.27(8) . . ?
O31 Mo3 S12 134.19(8) . . ?
O32 Mo3 S12 84.80(8) . . ?
S123 Mo3 S12 109.73(4) . . ?
O31 Mo3 S22 133.19(8) . . ?
O32 Mo3 S22 84.01(8) . . ?
S123 Mo3 S22 109.94(4) . . ?
S12 Mo3 S22 84.57(4) . . ?
O31 Mo3 S21 89.52(8) . . ?
O32 Mo3 S21 93.88(8) . . ?
S123 Mo3 S21 85.61(4) . . ?
S12 Mo3 S21 133.72(4) . . ?
S22 Mo3 S21 49.45(4) . . ?
O31 Mo3 S11 90.13(8) . . ?
O32 Mo3 S11 94.36(8) . . ?
S123 Mo3 S11 85.85(4) . . ?
S12 Mo3 S11 49.62(4) . . ?
S22 Mo3 S11 133.98(4) . . ?
S21 Mo3 S11 171.44(4) . . ?
O31 Mo3 Mo1 125.47(8) . . ?
O32 Mo3 Mo1 139.09(8) . . ?
S123 Mo3 Mo1 55.04(3) . . ?
S12 Mo3 Mo1 95.68(3) . . ?
S22 Mo3 Mo1 55.48(3) . . ?
S21 Mo3 Mo1 56.98(2) . . ?
S11 Mo3 Mo1 116.94(3) . . ?
O31 Mo3 Mo2 125.51(8) . . ?
O32 Mo3 Mo2 139.68(8) . . ?
S123 Mo3 Mo2 54.88(3) . . ?
S12 Mo3 Mo2 55.31(3) . . ?
S22 Mo3 Mo2 96.48(3) . . ?
S21 Mo3 Mo2 116.98(3) . . ?
S11 Mo3 Mo2 56.90(3) . . ?
Mo1 Mo3 Mo2 60.109(13) . . ?
O33 K1 O14 136.66(10) . 1_554 ?
O33 K1 O23 89.47(12) . 2_565 ?
O14 K1 O23 87.04(10) 1_554 2_565 ?
O33 K1 O14 128.73(10) . 2 ?
O14 K1 O14 91.74(9) 1_554 2 ?
O23 K1 O14 74.80(9) 2_565 2 ?
O33 K1 O34 59.66(9) . . ?
O14 K1 O34 158.22(10) 1_554 . ?
O23 K1 O34 77.88(11) 2_565 . ?
O14 K1 O34 69.32(9) 2 . ?
O33 K1 O1W 112.97(12) . . ?
O14 K1 O1W 64.86(10) 1_554 . ?
O23 K1 O1W 151.68(11) 2_565 . ?
O14 K1 O1W 101.34(10) 2 . ?
O34 K1 O1W 127.79(11) . . ?
O33 K1 O24 71.69(12) . 2_565 ?
O14 K1 O24 69.53(9) 1_554 2_565 ?
O23 K1 O24 59.30(10) 2_565 2_565 ?
O14 K1 O24 130.41(10) 2 2_565 ?
O34 K1 O24 114.17(10) . 2_565 ?
O1W K1 O24 110.02(10) . 2_565 ?
O33 K1 O12 110.52(11) . 2 ?
O14 K1 O12 109.51(9) 1_554 2 ?
O23 K1 O12 116.73(9) 2_565 2 ?
O14 K1 O12 45.35(8) 2 2 ?
O34 K1 O12 65.09(9) . 2 ?
O1W K1 O12 72.72(9) . 2 ?
O24 K1 O12 175.75(9) 2_565 2 ?
O33 K1 C12 119.03(11) . 2 ?
O14 K1 C12 104.31(10) 1_554 2 ?
O23 K1 C12 93.92(10) 2_565 2 ?
O14 K1 C12 22.27(9) 2 2 ?
O34 K1 C12 61.78(10) . 2 ?
O1W K1 C12 89.99(10) . 2 ?
O24 K1 C12 152.18(11) 2_565 2 ?
O12 K1 C12 23.59(9) 2 2 ?
O33 K1 C21 71.33(12) . 2_565 ?
O14 K1 C21 93.66(10) 1_554 2_565 ?
O23 K1 C21 20.72(9) 2_565 2_565 ?
O14 K1 C21 94.20(10) 2 2_565 ?
O34 K1 C21 77.72(11) . 2_565 ?
O1W K1 C21 153.55(11) . 2_565 ?
O24 K1 C21 44.89(10) 2_565 2_565 ?
O12 K1 C21 131.81(10) 2 2_565 ?
C12 K1 C21 111.16(11) 2 2_565 ?
O33 K1 C22 64.46(12) . 2_565 ?
O14 K1 C22 83.96(10) 1_554 2_565 ?
O23 K1 C22 44.10(10) 2_565 2_565 ?
O14 K1 C22 118.84(10) 2 2_565 ?
O34 K1 C22 95.61(11) . 2_565 ?
O1W K1 C22 129.75(11) . 2_565 ?
O24 K1 C22 19.88(9) 2_565 2_565 ?
O12 K1 C22 157.53(10) 2 2_565 ?
C12 K1 C22 137.36(11) 2 2_565 ?
C21 K1 C22 26.32(10) 2_565 2_565 ?
O33 K1 C31 17.48(10) . . ?
O14 K1 C31 153.96(10) 1_554 . ?
O23 K1 C31 89.01(10) 2_565 . ?
O14 K1 C31 112.00(10) 2 . ?
O34 K1 C31 42.68(9) . . ?
O1W K1 C31 117.65(11) . . ?
O24 K1 C31 86.38(10) 2_565 . ?
O12 K1 C31 95.22(9) 2 . ?
C12 K1 C31 101.63(10) 2 . ?
C21 K1 C31 74.76(10) 2_565 . ?
C22 K1 C31 75.42(10) 2_565 . ?
S12 S11 Mo2 62.61(4) . . ?
S12 S11 Mo3 62.69(4) . . ?
Mo2 S11 Mo3 66.10(3) . . ?
S11 S12 Mo2 67.70(4) . . ?
S11 S12 Mo3 67.69(4) . . ?
Mo2 S12 Mo3 69.23(3) . . ?
S22 S21 Mo3 63.35(4) . . ?
S22 S21 Mo1 63.01(4) . . ?
Mo3 S21 Mo1 66.18(3) . . ?
S21 S22 Mo1 67.50(4) . . ?
S21 S22 Mo3 67.20(4) . . ?
Mo1 S22 Mo3 68.75(3) . . ?
S32 S31 Mo1 63.43(4) . . ?
S32 S31 Mo2 62.82(4) . . ?
Mo1 S31 Mo2 66.70(3) . . ?
S31 S32 Mo2 67.58(4) . . ?
S31 S32 Mo1 66.86(4) . . ?
Mo2 S32 Mo1 69.26(3) . . ?
Mo3 S123 Mo2 70.30(3) . . ?
Mo3 S123 Mo1 70.01(3) . . ?
Mo2 S123 Mo1 70.25(3) . . ?
C11 O11 Mo1 117.1(3) . . ?
C12 O12 Mo1 116.8(3) . . ?
C12 O12 K1 89.0(2) . 2 ?
Mo1 O12 K1 150.36(12) . 2 ?
C12 O14 K1 125.3(3) . 1_556 ?
C12 O14 K1 97.2(3) . 2 ?
K1 O14 K1 88.26(9) 1_556 2 ?
C21 O21 Mo2 117.5(3) . . ?
C22 O22 Mo2 117.4(3) . . ?
C21 O23 K1 105.5(3) . 2_565 ?
C22 O24 K1 106.1(3) . 2_565 ?
C31 O31 Mo3 116.6(3) . . ?
C32 O32 Mo3 117.1(3) . . ?
C31 O33 K1 120.3(3) . . ?
C32 O34 K1 116.7(3) . . ?
C45 N4 C41 106.0(6) . . ?
C45 N4 C43 111.1(6) . . ?
C41 N4 C43 111.0(5) . . ?
C45 N4 C47 110.1(5) . . ?
C41 N4 C47 111.4(6) . . ?
C43 N4 C47 107.3(5) . . ?
C51 N5 C51 180.000(4) . 2_466 ?
C51 N5 C55 63.3(7) . 2_466 ?
C51 N5 C55 116.7(7) 2_466 2_466 ?
C51 N5 C55 116.7(7) . . ?
C51 N5 C55 63.3(7) 2_466 . ?
C55 N5 C55 180.000(2) 2_466 . ?
C51 N5 C53 72.7(8) . 2_466 ?
C51 N5 C53 107.3(8) 2_466 2_466 ?
C55 N5 C53 107.7(6) 2_466 2_466 ?
C55 N5 C53 72.3(6) . 2_466 ?
C51 N5 C53 107.3(8) . . ?
C51 N5 C53 72.7(8) 2_466 . ?
C55 N5 C53 72.3(6) 2_466 . ?
C55 N5 C53 107.7(6) . . ?
C53 N5 C53 180.000(4) 2_466 . ?
C51 N5 C52 66.6(8) . 2_466 ?
C51 N5 C52 113.4(8) 2_466 2_466 ?
C55 N5 C52 102.1(7) 2_466 2_466 ?
C55 N5 C52 77.9(7) . 2_466 ?
C53 N5 C52 109.3(7) 2_466 2_466 ?
C53 N5 C52 70.7(7) . 2_466 ?
C51 N5 C52 113.4(8) . . ?
C51 N5 C52 66.6(8) 2_466 . ?
C55 N5 C52 77.9(7) 2_466 . ?
C55 N5 C52 102.1(7) . . ?
C53 N5 C52 70.7(7) 2_466 . ?
C53 N5 C52 109.3(7) . . ?
C52 N5 C52 180.000(3) 2_466 . ?
O13 C11 O11 123.1(4) . . ?
O13 C11 C12 121.3(4) . . ?
O11 C11 C12 115.6(4) . . ?
O14 C12 O12 125.5(4) . . ?
O14 C12 C11 120.5(4) . . ?
O12 C12 C11 114.0(3) . . ?
O14 C12 K1 60.5(2) . 2 ?
O12 C12 K1 67.4(2) . 2 ?
C11 C12 K1 162.1(3) . 2 ?
O23 C21 O21 124.4(4) . . ?
O23 C21 C22 121.0(4) . . ?
O21 C21 C22 114.6(3) . . ?
O23 C21 K1 53.8(2) . 2_565 ?
O21 C21 K1 143.5(3) . 2_565 ?
C22 C21 K1 80.7(2) . 2_565 ?
O24 C22 O22 125.7(4) . . ?
O24 C22 C21 121.2(4) . . ?
O22 C22 C21 113.1(3) . . ?
O24 C22 K1 54.0(2) . 2_565 ?
O22 C22 K1 156.2(3) . 2_565 ?
C21 C22 K1 73.0(2) . 2_565 ?
O33 C31 O31 123.9(4) . . ?
O33 C31 C32 120.4(4) . . ?
O31 C31 C32 115.7(3) . . ?
O33 C31 K1 42.2(2) . . ?
O31 C31 K1 163.0(3) . . ?
C32 C31 K1 79.0(2) . . ?
O34 C32 O32 125.5(4) . . ?
O34 C32 C31 120.9(4) . . ?
O32 C32 C31 113.6(3) . . ?
C42 C41 N4 117.9(9) . . ?
C44 C43 N4 116.0(7) . . ?
N4 C45 C46 114.9(6) . . ?
C48 C47 N4 114.2(5) . . ?
N5 C51 C55 61.4(7) . 2_466 ?
N5 C51 C52 60.1(7) . 2_466 ?
C55 C51 C52 97.0(11) 2_466 2_466 ?
N5 C51 C54 108.0(9) . 2_466 ?
C55 C51 C54 128.6(11) 2_466 2_466 ?
C52 C51 C54 121.9(11) 2_466 2_466 ?
N5 C51 C53 56.6(6) . 2_466 ?
C55 C51 C53 96.5(9) 2_466 2_466 ?
C52 C51 C53 95.6(9) 2_466 2_466 ?
C54 C51 C53 51.5(7) 2_466 2_466 ?
N5 C52 C56 103.9(8) . 2_466 ?
N5 C52 C51 53.3(6) . 2_466 ?
C56 C52 C51 125.6(11) 2_466 2_466 ?
N5 C52 C53 54.6(5) . 2_466 ?
C56 C52 C53 119.1(10) 2_466 2_466 ?
C51 C52 C53 88.7(9) 2_466 2_466 ?
N5 C52 C55 50.6(5) . 2_466 ?
C56 C52 C55 53.4(6) 2_466 2_466 ?
C51 C52 C55 89.3(8) 2_466 2_466 ?
C53 C52 C55 83.5(7) 2_466 2_466 ?
C54 C53 N5 112.6(7) . . ?
C54 C53 C51 62.0(7) . 2_466 ?
N5 C53 C51 50.7(5) . 2_466 ?
C54 C53 C52 133.2(9) . 2_466 ?
N5 C53 C52 54.8(6) . 2_466 ?
C51 C53 C52 89.0(8) 2_466 2_466 ?
C54 C53 C55 128.4(9) . 2_466 ?
N5 C53 C55 53.4(5) . 2_466 ?
C51 C53 C55 89.5(8) 2_466 2_466 ?
C52 C53 C55 83.3(8) 2_466 2_466 ?
C53 C54 C51 66.5(6) . 2_466 ?
N5 C55 C51 55.3(5) . 2_466 ?
N5 C55 C56 104.7(8) . . ?
C51 C55 C56 128.1(10) 2_466 . ?
N5 C55 C53 54.2(5) . 2_466 ?
C51 C55 C53 90.5(8) 2_466 2_466 ?
C56 C55 C53 117.0(9) . 2_466 ?
N5 C55 C52 51.5(5) . 2_466 ?
C51 C55 C52 90.5(8) 2_466 2_466 ?
C56 C55 C52 53.2(6) . 2_466 ?
C53 C55 C52 84.6(7) 2_466 2_466 ?
C52 C56 C55 73.4(6) 2_466 . ?

_diffrn_measured_fraction_theta_max 0.953
_diffrn_reflns_theta_full        25.00
_diffrn_measured_fraction_theta_full 0.958
_refine_diff_density_max         1.252
_refine_diff_density_min         -0.844
_refine_diff_density_rms         0.126


_diffrn_radiation_probe          x-ray


_publ_section_references         
;
Bruker AXS Inc. (2004). APEX2 (Version 1.08), SAINT (Version 7.03), 
SADABS (Version 2.11) and SHELXTL (Version 6.12). 
Bruker Advanced X-ray Solutions, Madison, Wisconsin, USA.
;
